# Supplementary material
Source: MDPI journal article supplement (https://www.mdpi.com/1424-8247/14/7/598)
Supplement: s1 [file s1]

| NIT           | IC50 (μM) |        |       |       |
|---------------|-----------|--------|-------|-------|
|               | Day 1     | Day 2  | Day 3 | Day 4 |
| Staurosporine | 2.38      | <1.56  | <1.56 | <1.56 |
| MT4           | 56.6      | <31.3  | <31.3 | <31.3 |
| Ruxolitinib   | 207.52    | <31.3  | <31.3 | <31.3 |
| Leflunomide   | 191.84    | 174.11 | 172.0 | 162.8 |
| Sunitinib     | >500      | 161.5  | 154.5 | <31.3 |
| CID1067700    | >500      | >500   | >500  | 215.1 |
| Alvocidib     | >500      | >500   | 427   | 328.2 |
